# Supplementary material for: Plasma lipoproteins: genetic influences and clinical implications
Source: Springer Nature journal article supplement (doi:10.1038/nrg2481), 2009-01-13
Supplement: 41576_2009_BFnrg2481_MOESM1_ESM.pdf [file 41576_2009_BFnrg2481_MOESM1_ESM.pdf]

SUPPLEMENTARY INFORMATION, Table 1 | **Summary of main lipoprotein classes**

| <b>Lipoprotein Class</b> | <b>Triglyceride (% by weight)</b> | <b>Phospholipid (% by weight)</b> | <b>Free cholesterol (% by weight)</b> | <b>Esterified cholesterol (% by weight)</b> | <b>Protein (% by weight)</b> | <b>Main apolipoproteins</b>               |
|--------------------------|-----------------------------------|-----------------------------------|---------------------------------------|---------------------------------------------|------------------------------|-------------------------------------------|
| Chylomicrons             | 80 - 95                           | 3 - 6                             | 1 – 3                                 | 2 - 4                                       | 1 - 2                        | A-I, A-IV, A-V; B-48, C-I, C-II, C-III, E |
| VLDL                     | 45 - 65                           | 15 - 20                           | 4 – 8                                 | 16 - 22                                     | 6 - 10                       | B-100, E, C-I, C-II, C-III                |
| LDL                      | 4 - 8                             | 18 - 24                           | 6 – 8                                 | 45 - 50                                     | 18 - 22                      | B-100                                     |
| HDL                      | 2 - 7                             | 26 - 32                           | 3 – 5                                 | 15 - 20                                     | 45 - 55                      | A-I, A-II, E                              |

VLDL, very low density lipoprotein; LDL, low density lipoprotein; HDL, high density lipoprotein.
